# Supplementary material for: Effect of Acupuncture vs Sham Procedure on Chemotherapy-Induced Peripheral Neuropathy Symptoms: A Randomized Clinical Trial
Source: PubMed Central journal article supplement (PMC7066475; doi:10.1001/jamanetworkopen.2020.0681), 2020-03-11
Supplement: jamanetwopen-3-e200681-s002.pdf [file jamanetwopen-3-e200681-s002.pdf]

## Data Sharing Statement

Bao T, Patil S, Chen C, et al. Effect of acupuncture vs sham procedure on chemotherapy-induced peripheral neuropathy symptoms: a randomized clinical trial. *JAMA Netw Open*. 2020;3(3):e200681. doi:10.1001/jamanetworkopen.2020.0681

### Data

**Data available:** Yes

**Data types:** Deidentified participant data

**How to access data:** [baot@mskcc.org](mailto:baot@mskcc.org)

**When available:** With publication

### Supporting Documents

**Document types:** Informed consent form

**How to access documents:** [baot@mskcc.org](mailto:baot@mskcc.org)

**When available:** With publication

### Additional Information

**Who can access the data:** researchers whose proposed use of the data has been approved

**Types of analyses:** for research

**Mechanisms of data availability:** after approval of a proposal and with a signed data access agreement

**Any additional restrictions:** none
